# Supplementary material
Source: PubMed Central journal article supplement (PMC3169827)
Supplement: mmc1.pdf [file mmc1.pdf]

**The American Journal of Human Genetics, Volume 89  
Supplemental Data**

***ST3GAL3* Mutations Impair the Development  
of Higher Cognitive Functions**

**Hao Hu, Katinka Eggers, Wei Chen, Masoud Garshasbi, M. Mahdi Motazacker, Klaus Wrogemann,  
Kimia Kahrizi, Andreas Tzschach, Masoumeh Hosseini, Ideh Bahman, Tim Hucho, Martina Mühlenhoff,  
Rita Gerardy-Schahn, Hossein Najmabadi, H. Hilger Ropers, Andreas W. Kuss**

Table S1. Mutation Details

| <b>Patient/Family</b> | <b>Mutation in <i>ST3GAL3</i></b>        | <b>Supporting Reads</b> | <b>Allelic percentage</b> | <b>PhyloP44 vertebrate<sup>a</sup> conservation score</b> |
|-----------------------|------------------------------------------|-------------------------|---------------------------|-----------------------------------------------------------|
| M096                  | NM_006279.2:<br>c.38C>A,<br>p.Ala13Asp   | 13                      | 93                        | 3.881                                                     |
| M319                  | NM_006279.2:<br>c.1108G>T<br>p.Asp370Tyr | 27                      | 100                       | 5.496                                                     |

<sup>a</sup>[<http://hgdownload.cse.ucsc.edu/goldenPath/hg18/database/phyloP44wayAll.txt.gz>]

Table S2. Clinical Features

| Family | Individual | Sex | Age [y] at examination | IQ | Height [cm] | OFC <sup>a</sup> [cm] | Additional features       |
|--------|------------|-----|------------------------|----|-------------|-----------------------|---------------------------|
| M096   | VI:8       | f   | 35                     | 40 | 159         | 54                    | -                         |
|        | VI:9       | m   | 34                     | 25 | 164         | 57                    | -                         |
|        | VI:10      | m   | 40                     | 30 | 160         | 55                    |                           |
|        | VI:14      | m   | 26                     | 35 | 178         | 54                    | -                         |
|        | VI:15      | m   | 17                     | 40 | 150         | 53                    | severe kyphosis           |
|        | VI:16      | f   | 22                     | 45 | 155         | 53                    |                           |
|        | VI:18      | f   | 18                     | 55 | 150         | 51                    |                           |
|        | VI:19      | f   | 15                     | 40 | 146         | 52                    |                           |
|        |            |     |                        |    |             |                       |                           |
| M319   | IV:3       | m   | 34                     | 30 | 165         | 54                    | brachydactyly (left foot) |
|        | V:1        | m   | 17                     | 40 | 172         | 52                    |                           |
|        | V:2        | f   | 16                     | 40 | 163         | 53                    | -                         |
|        | V:5        | m   | 4                      | 50 | 101         | 48                    | -                         |

<sup>a</sup>Occipitofrontal circumference

Table S3. Cloning Strategies

| Plasmid                                   | Primers                                            | Template                                                                                        | Cloning                               | Vector                             |
|-------------------------------------------|----------------------------------------------------|-------------------------------------------------------------------------------------------------|---------------------------------------|------------------------------------|
| ST3Gal-III <sup>wt</sup>                  | 5'-GACTAAGCTTATGGGACTCTTGGTATTTG<br>TG-3'          | cDNA ( splice variant B1,<br>accession no. NM_006279.2)<br>purchased from Origene<br>(RC208261) | HindIII/NotI                          | pcDNA3 (Invitrogen)                |
|                                           | 5'-GATCGCGGCCGCTCAGATGCCACTGCTTA<br>GATCAGTG-3'    |                                                                                                 |                                       |                                    |
| ST3Gal-III <sup>Ala13Asp</sup>            | 5'-GCGCAATCTGCTGCTAGATCTCTGCCTCT<br>TTCTGG-3'      | pcDNA3-ST3Gal-III <sup>wt</sup>                                                                 | site-directed<br>mutagenesis          | pcDNA3 (Invitrogen)                |
|                                           | 5'-CCAGAAAGAGGCAGAGATCTAGCAGCAG<br>ATTGCGC-3'      |                                                                                                 |                                       |                                    |
| ST3Gal-III <sup>Asp370Tyr</sup>           | 5'-GCTCGGTCATCACTTACCTAAGCAGTGG<br>CATCTGAG-3'     | pcDNA3-ST3Gal-III <sup>wt</sup>                                                                 | site-directed<br>mutagenesis          | pcDNA3 (Invitrogen)                |
|                                           | 5'-CTCAGATGCCACTGCTTAGGTAAGTGATG<br>ACGCGAGC-3'    |                                                                                                 |                                       |                                    |
| ST3Gal-III <sup>wt</sup> -myc             | 5'-GATCGCGGCCGCTCGATATGGGACTCTTG<br>GTATTTGTGCG-3' | pcDNA3-ST3Gal-III <sup>wt</sup>                                                                 | XbaI/NotI                             | pcDNA3.1-Myc/His A<br>(Invitrogen) |
|                                           | 5'-GTAGTCTAGAGATGCCACTGCTTAGATCA<br>-3'            |                                                                                                 |                                       |                                    |
| ST3Gal-III <sup>Ala13Asp</sup> -myc       | 5'-GATCGCGGCCGCTCGATATGGGACTCTTG<br>GTATTTGTGCG-3' | pcDNA3-ST3Gal-III <sup>A13D</sup>                                                               | XbaI/NotI                             | pcDNA3.1-Myc/His A<br>(Invitrogen) |
|                                           | 5'-GTAGTCTAGAGATGCCACTGCTTAGATCA<br>-3'            |                                                                                                 |                                       |                                    |
| ST3Gal-III <sup>Asp370Tyr</sup> -myc      | 5'-GATCGCGGCCGCTCGATATGGGACTCTTG<br>GTATTTGTGCG-3' | pcDNA3-ST3Gal-III <sup>D370Y</sup>                                                              | XbaI/NotI                             | pcDNA3.1-Myc/His A<br>(Invitrogen) |
|                                           | 5'-GTAGTCTAGAGATGCCACTGCTTAGGTAA<br>-3'            |                                                                                                 |                                       |                                    |
| ProtA-Δ40-ST3Gal-III <sup>wt</sup>        | 5'-CAGTGGTTCTTTCTTTGACTCCG-3'                      | cDNA ( splice variant B1,<br>accession no. NM_006279.2)<br>purchased from Origene<br>(RC208261) | blunt end ligation<br>into EcoRI site | pPROTA <sup>25</sup>               |
|                                           | 5'-TCAGATGCCACTGCTTAGATCAGTG-3'                    |                                                                                                 |                                       |                                    |
| ProtA-Δ40-ST3Gal-III <sup>Asp370Tyr</sup> | 5'-GCTCGGTCATCACTTACCTAAGCAGTGG<br>CATCTGAG-3'     | ProtA-Δ40-ST3Gal-III <sup>wt</sup>                                                              | site-directed<br>mutagenesis          | pPROTA <sup>25</sup>               |
|                                           | 5'-CTCAGATGCCACTGCTTAGGTAAGTGATG<br>ACGCGAGC-3'    |                                                                                                 |                                       |                                    |
